# Supplementary material for: Erythrocyte-microglia crosstalk contributing to sex differences in pediatric brain tumorigenesis
Source: Research Square preprint supplement (doi:10.21203/rs.3.rs-6323329/v1), 2025-12-10
Supplement: Supplementary file 1 [file e9d902fda3857dddf6728be2.xlsx]

## Sheet: Supplementary Table 1
Supplementary Table 1. Primers used in genotyping.
Gene	Forward Sequence	Reverse Sequence
Sry	TTGTCTAGAGAGCATGGAGGGCCATGTCAA	CCACTCCTCTGTGACACTTTAGCCCTCCGA

## Sheet: Supplementary Table 2
Supplementary Table 2. sgRNA sequences targeting ABCA1, BLVRB, GPX1, LGALS1 and TNFAIP2.
sgRNA	Gene targeted	sgRNA sequence
ABCA1_1	ABCA1	CTGGGGTACTTGCCAAAGGG
ABCA1_2	ABCA1	TGACACGCTGACCATCGGTA
BLVRB_1	BLVRB	TCGTGGCCTGCACCTCGGGT
BLVRB_2	BLVRB	CCAGACCGGGCTCACCACCC
GPX1_1	GPX1	ACCAGGCCGGACGTACTTGA
GPX1_2	GPX1	CCGGACCGTGGTGCCTCAGA
LGALS1_1	LGALS1	AACCCTCGCTTCAACGCCCA
LGALS1_2	LGALS1	AGCAACCTGAATCTCAAACC
TNFAIP2_1	TNFAIP2	CTGGTGGTAGCTCTCGGCGT
TNFAIP2_2	TNFAIP2	GGTGCGGCGCCAGAGCAAGG

## Sheet: Supplementary Table 3
Supplementary Table 3. Primers used in RT-qPCR.
Gene	Forward Sequence	Reverse Sequence
SOX2	TACAGCATGTCCTACTCGCAG	GAGGAAGAGGTAACCACAGGG
NES	GGCGCACCTCAAGATGTCC	CTTGGGGTCCTGAAAGCTG
ACTB	GTCAGGCAGCTCGTAGCTCT	GCCATGTACGTTGCTATCCA
RPL39	CAGCTTCCCTCCTCTTCCTT	GCCAGGAATCGCTTAATCC
ABCA1	ACCCACCCTATGAACAACATGA	GAGTCGGGTAACGGAAACAGG
BLVRB	GGTGCAAGCAGGTTACGAAGT	GTGGGACTGAGGTCATTGCG
LGALS1	TCGCCAGCAACCTGAATCTC	GCACGAAGCTCTTAGCGTCA
GPX1	CAGTCGGTGTATGCCTTCTCG	GAGGGACGCCACATTCTCG
TNFAIP2	GGCCAATGTGAGGGAGTTGAT	CCCGCTTTATCTGTGAGCCC

## Sheet: Supplementary Table 4
Supplementary Table 4: List of primary antibodies.
Antibody	Supplier	Identifier	Clone
Rabbit monoclonal anti-SMARCD3/BAF60C (D6F1S)	Cell Signaling Technology	Cat# 62265, RRID:AB_2799624	D6F1S
Mouse monoclonal anti-Nestin (Clone rat-401)	Millipore	Cat# MAB353, RRID:AB_94911	rat-401
Rabbit polyclonal anti-GFAP	Agilent	Cat# Z0334, RRID:AB_10013382	Polyclonal
Rabbit polyclonal anti-Olig-2	Millipore	Cat# AB9610, RRID:AB_570666	Polyclonal
Mouse monoclonal anti-NPR-C	Santa Cruz Biotechnology	Cat #515449	E-5
Mouse monoclonal anti-TUBB3	BioLegend	Cat# 801201, RRID:AB_2313773	TUJ1
Mouse monoclonal anti-Synaptophysin	BioLegend	Cat# 837103, RRID:AB_2783410	SP17
Rabbit polyclonal anti-SOX2	Millipore	Cat#AB5603 RRID:AB_2286686	Polyclonal
Rabbit monoclonal anti-Ki67	Vector Laboratories	Cat# VP-RM04 RRID:AB_2336545	VP-RM04
Goat polyclonal anti-c-Myc	R&D Systems	Cat# AF3696 RRID:AB_2282405	Polyclonal
Rabbit monoclonal anti-c-Myc	Abcam	Cat# ab32072 RRID:AB_731658	Y69
Guinea Pig polyclonal anti-MAP2	SYSY Antibodies	Cat#188 004 RRID:AB_2138181	Polyclonal
Rat monoclonal anti-EOMES (dan11mag)	Thermo Fisher	Cat#14-4875-82 RRID:AB_11042577	Dan11Mag
Rabbit Polyclonal anti-ABCA1	Novus Biologics	Cat# NB400-105SS RRID:AB_10001089	Polyclonal
Guinea Pig monoclonal anti-IBA1	SYSY Antibodies	Cat#234 308 RRID:AB_2924932	Gp311H9
Rat monoclonal anti-CD45 (eFlour450)	Thermo Fisher	Cat#14-0451-82 RRID:AB_467251	30-F11
Rat monoclonal anti-CD11b (APC/Fire™ 810)	BioLegend	Cat#101288 RRID:AB_2910274	M1/70
Rat monoclonal anti-P2ry12 (APC)	BioLegend	Cat#848006 RRID:AB_2721468	S16007D
Rat monoclonal anti-CD133 eBioscience™	Thermo Fisher	Cat#14-1331-82 RRID:AB_467471	13A4
Rat monoclonal anti-CD133 PerCP-eFluor™ 710	Thermo Fisher	Cat#46-1331-82 RRID:AB_10670743	13A4
Rat monoclonal anti-Ter-119	BD Biosciences	Cat#550565 RRID:AB_393756	TER-119
Rat monoclonal anti-Ter-119 (RB545)	BD Horizon	Cat#569777	TER-119
Rat monoclonal anti-GYPA(CD235a)	BioLegend	Cat#116702 RRID:AB_2924454	S21003A
